# Supplementary material for: Development of new 2-piperidinium-4-styrylcoumarin derivatives with large Stokes shifts as potential fluorescent labels for biomolecules
Source: Royal Society of Chemistry journal article supplement (doi:10.1039/d2ra00716a), 2022-01-01
Supplement: d2ra00716a1.pdf [file d2ra00716a1.pdf]

# Electronic Supporting Information (ESI)

## Development of new 2-piperidinium-4-styrylcoumarin derivatives with large Stokes shifts as potential fluorescent labels for biomolecules

Raquel Eustáquio,<sup>a</sup> João P. Prates Ramalho,<sup>b,c</sup> Ana T. Caldeira,<sup>a,b</sup> António Pereira<sup>a,b\*</sup>

<sup>a</sup> HERCULES Laboratory and City University of Macau Chair in Sustainable Heritage, University of Évora, Largo Marquês de Marialva 8, 7000-809 Évora, Portugal.

<sup>b</sup> Chemistry Department, School of Sciences and Technology, University of Évora, Rua Romão Ramalho 59, 7000-671 Évora, Portugal.

<sup>c</sup> LAQV-REQUIMTE, University of Évora, Rua Romão Ramalho 59, 7000-671 Évora, Portugal.

\* Corresponding author.

E-mail address: [amlp@uevora.pt](mailto:amlp@uevora.pt)

### Contents:

|   |                                    |     |
|---|------------------------------------|-----|
| 1 | NMR spectra.....                   | S2  |
| 2 | Mass spectra.....                  | S9  |
| 3 | UV/Vis spectra.....                | S13 |
| 4 | Quantum chemical calculations..... | S14 |

# 1 NMR spectra

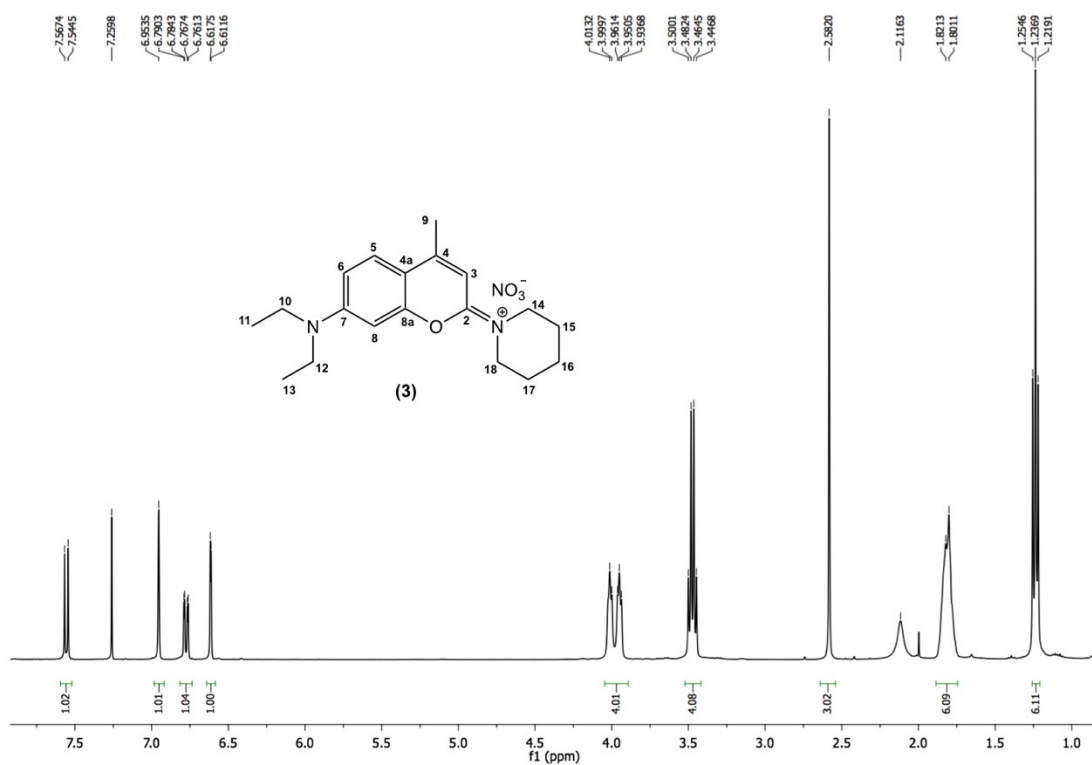

*<sup>1</sup>H-NMR spectrum of 3 (CDCl<sub>3</sub>, 400 MHz)*

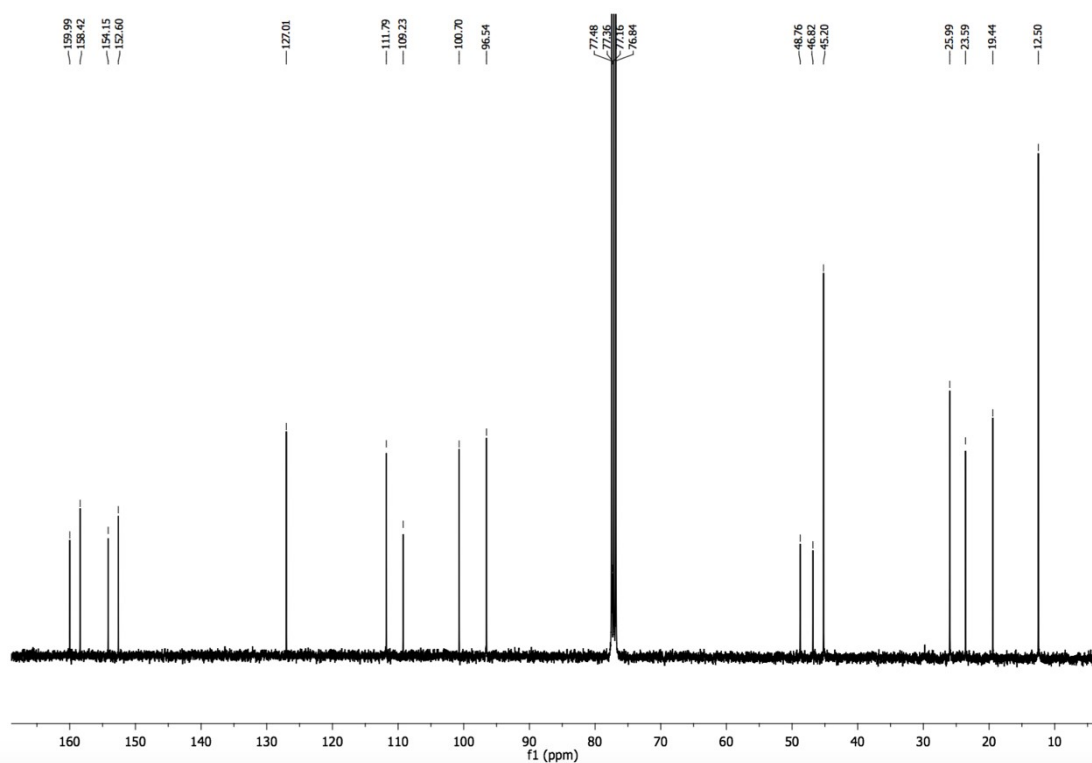

<sup>13</sup>C-NMR spectrum of **3** (CDCl<sub>3</sub>, 100 MHz)

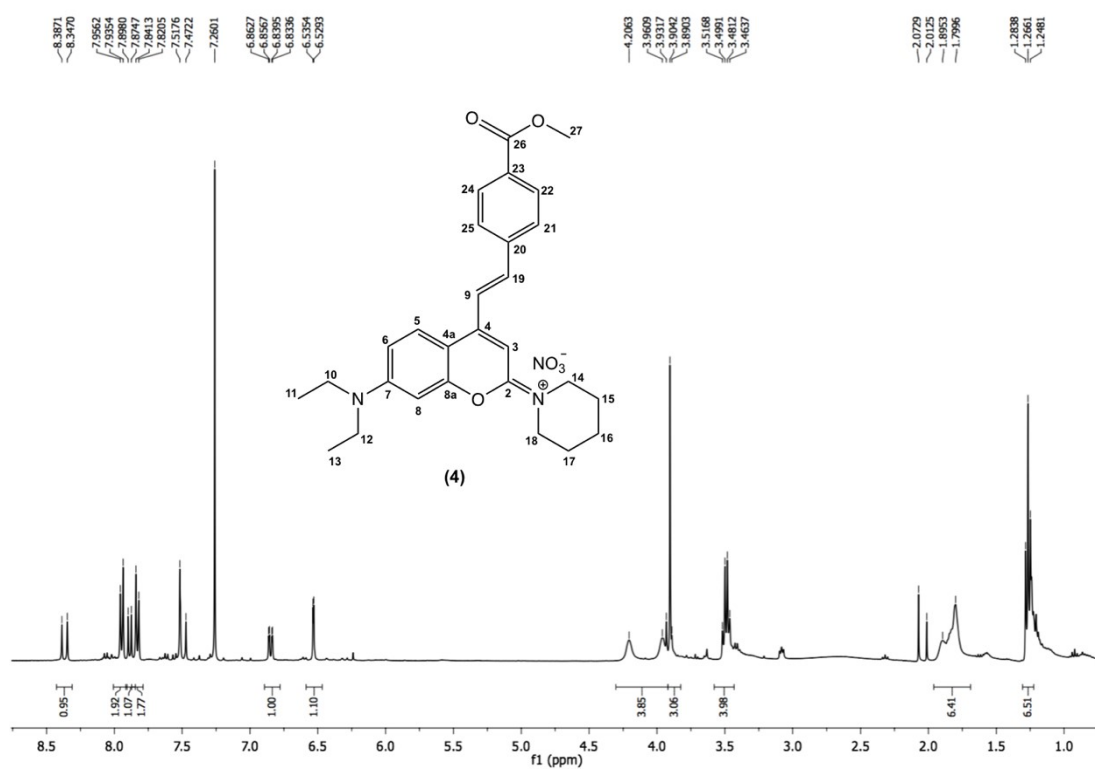

<sup>1</sup>H-NMR spectrum of **4** (CDCl<sub>3</sub>, 400 MHz)

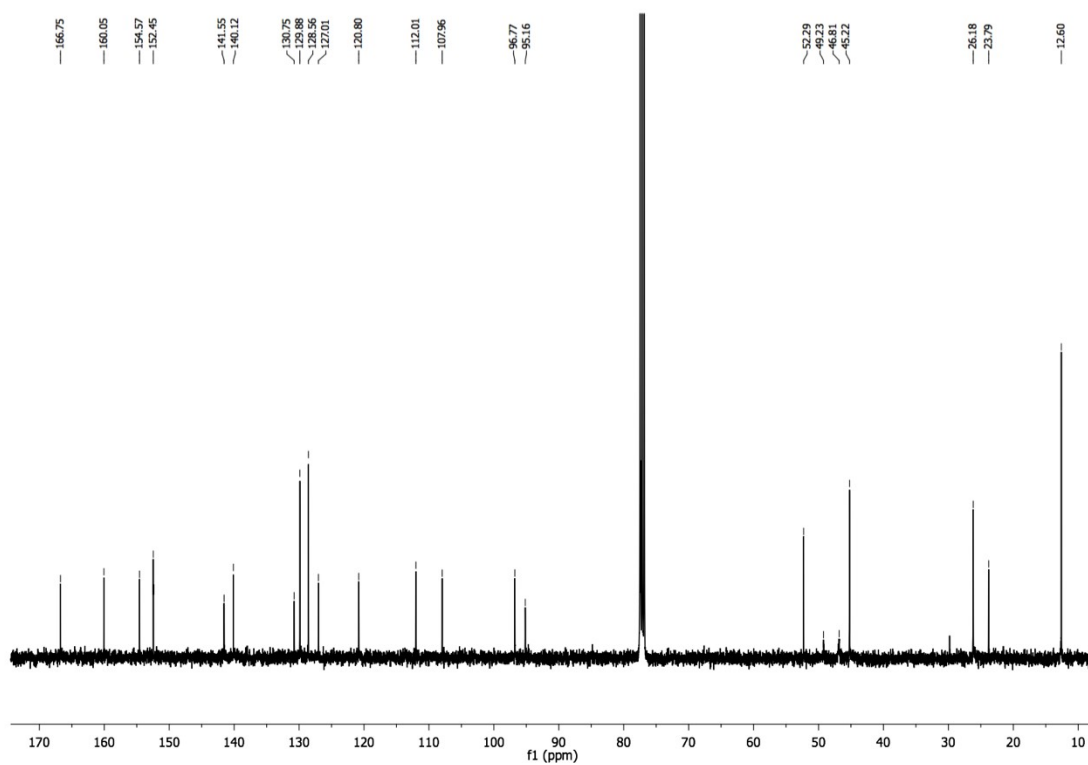

<sup>13</sup>C-NMR spectrum of **4** (CDCl<sub>3</sub>, 100 MHz)

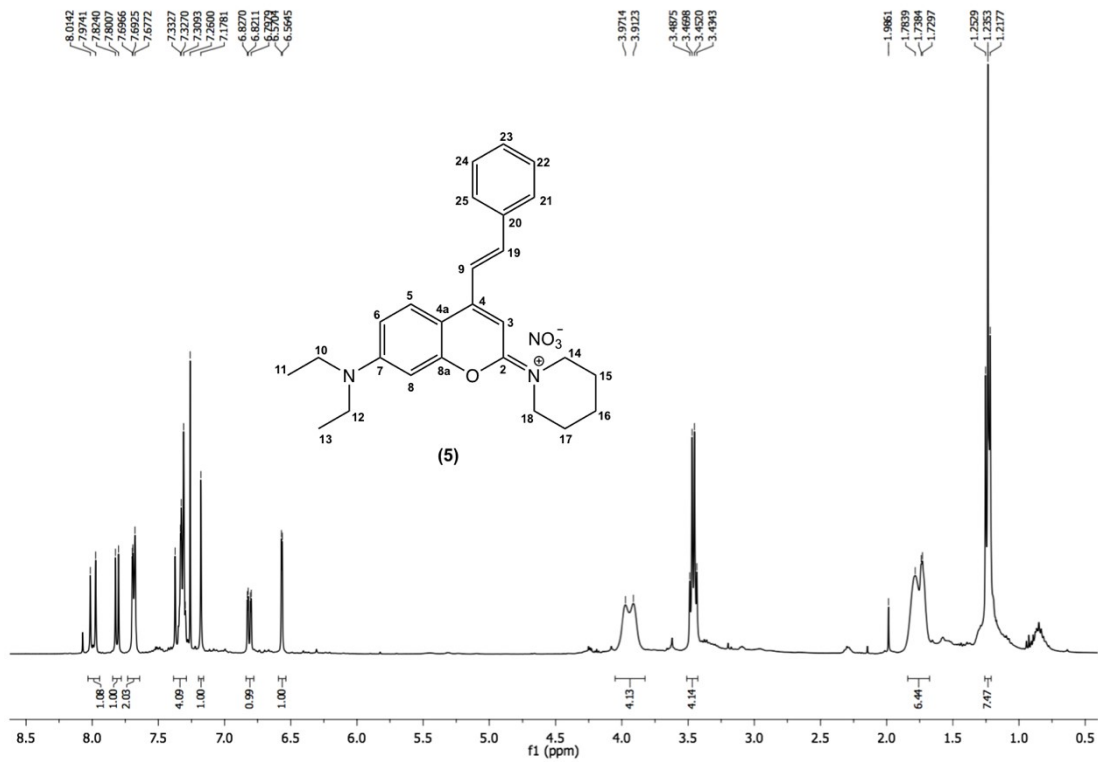

**<sup>1</sup>H-NMR spectrum of 5 (CDCl<sub>3</sub>, 400 MHz)**

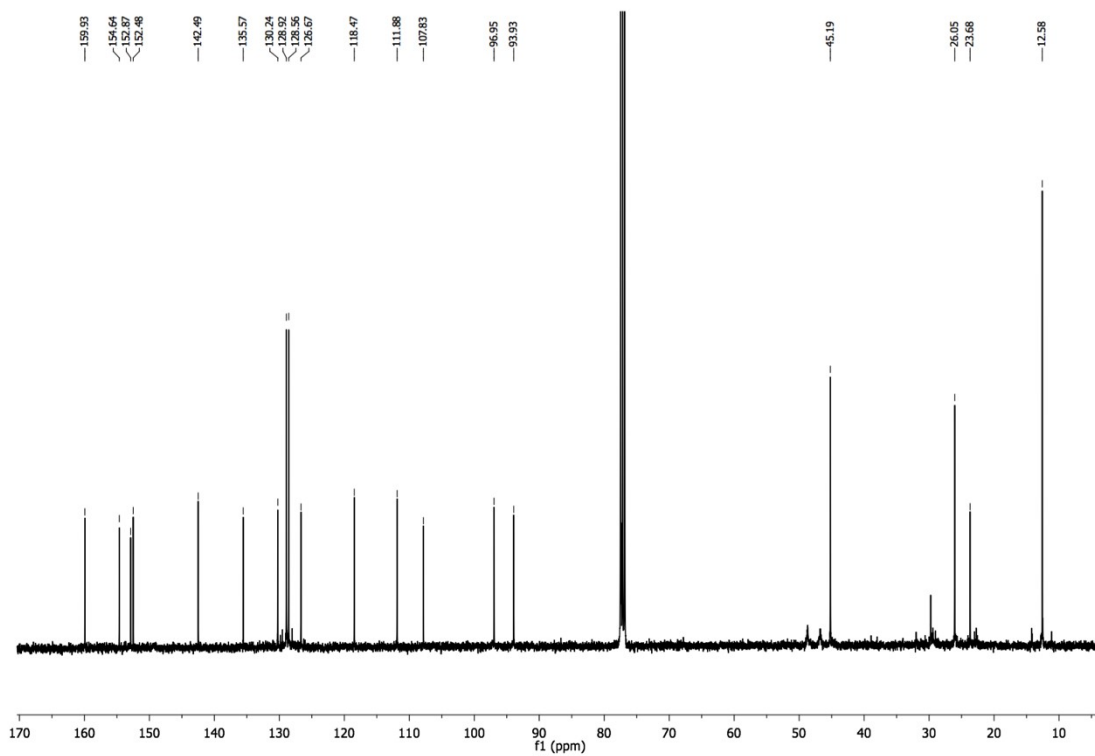

**<sup>13</sup>C-NMR spectrum of 5 (CDCl<sub>3</sub>, 100 MHz)**

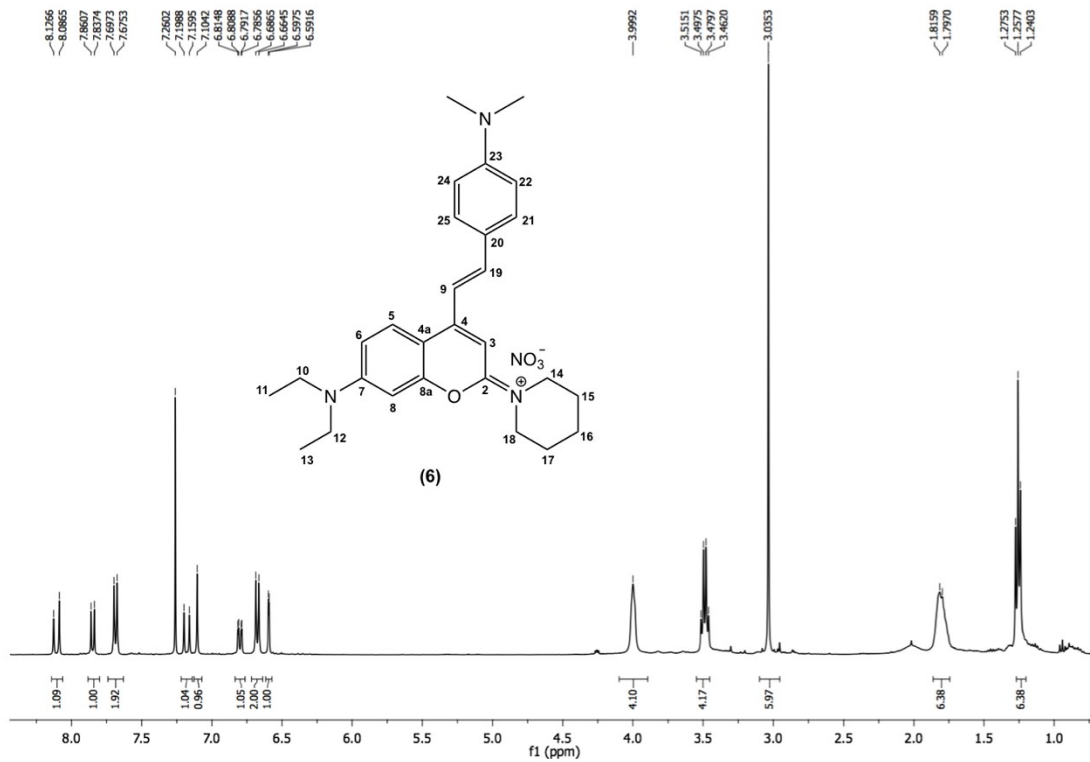

**<sup>1</sup>H-NMR spectrum of 6 (CDCl<sub>3</sub>, 400 MHz)**

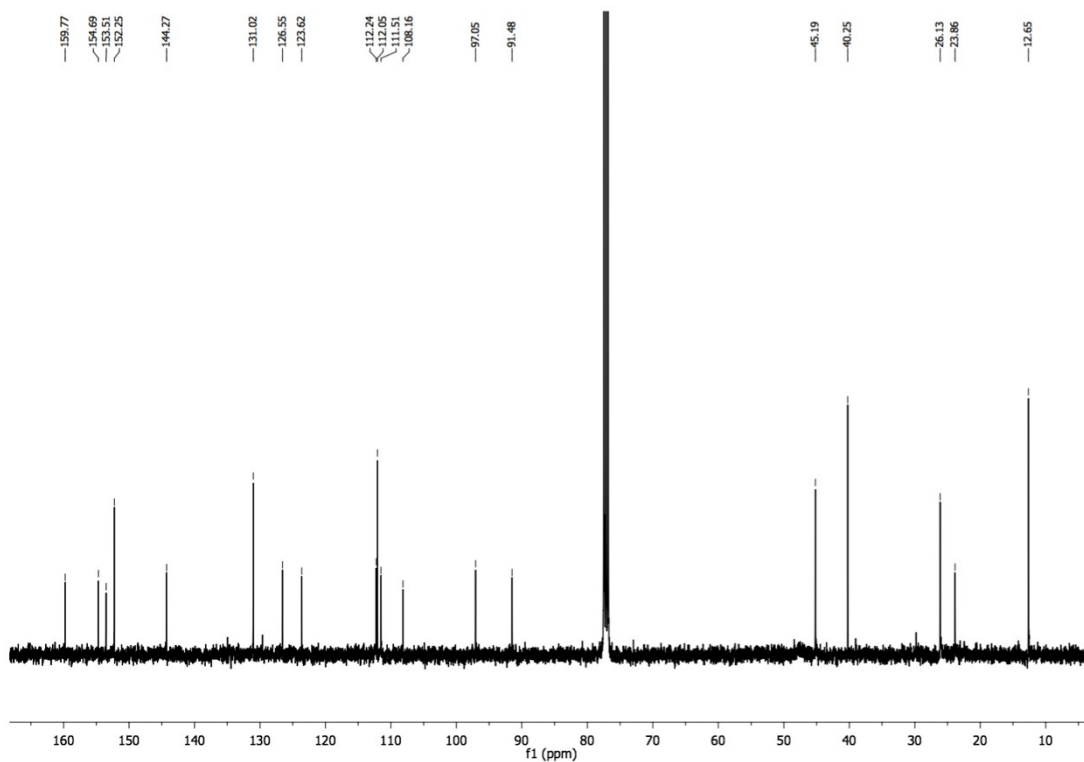

**<sup>13</sup>C-NMR spectrum of 6 (CDCl<sub>3</sub>, 100 MHz)**

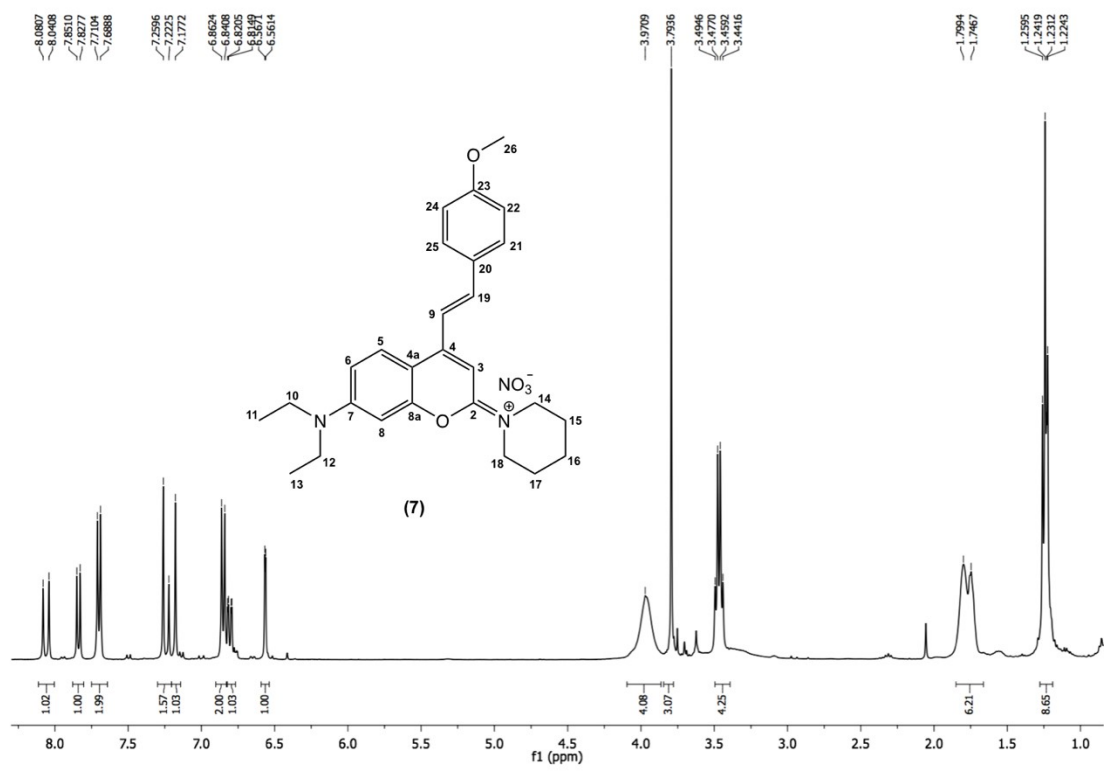

*<sup>1</sup>H-NMR spectrum of 7 (CDCl<sub>3</sub>, 400 MHz)*

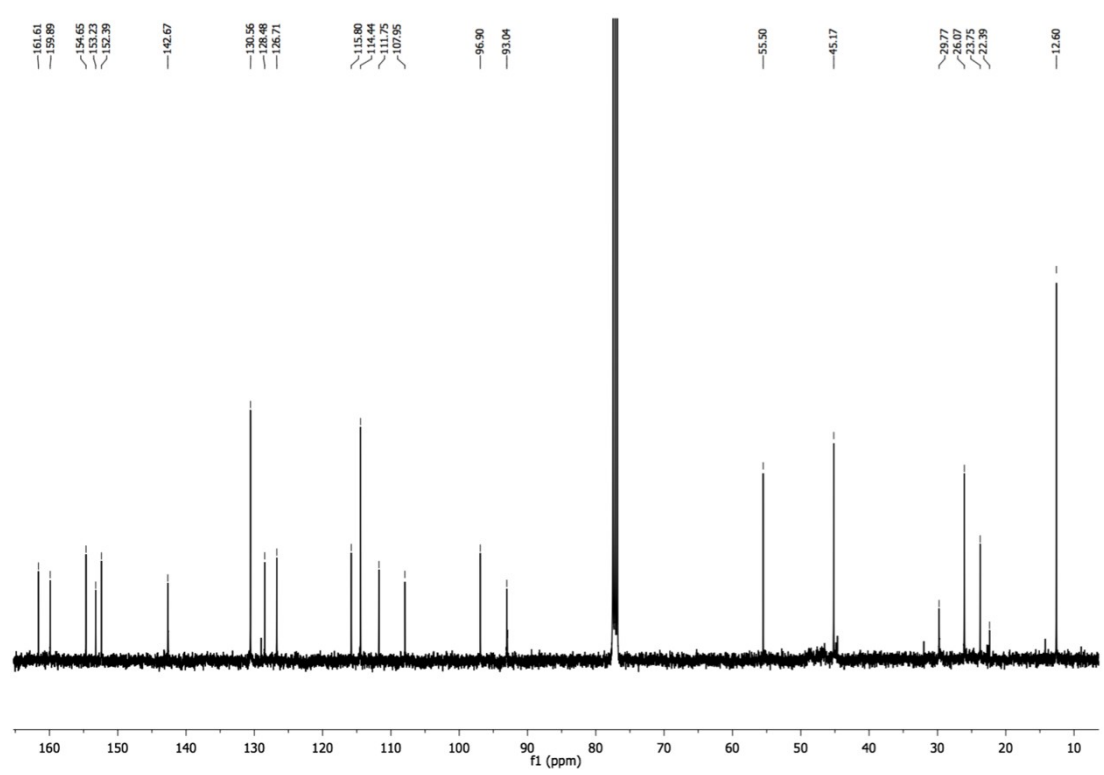

*<sup>13</sup>C-NMR spectrum of 7 (CDCl<sub>3</sub>, 100 MHz)*

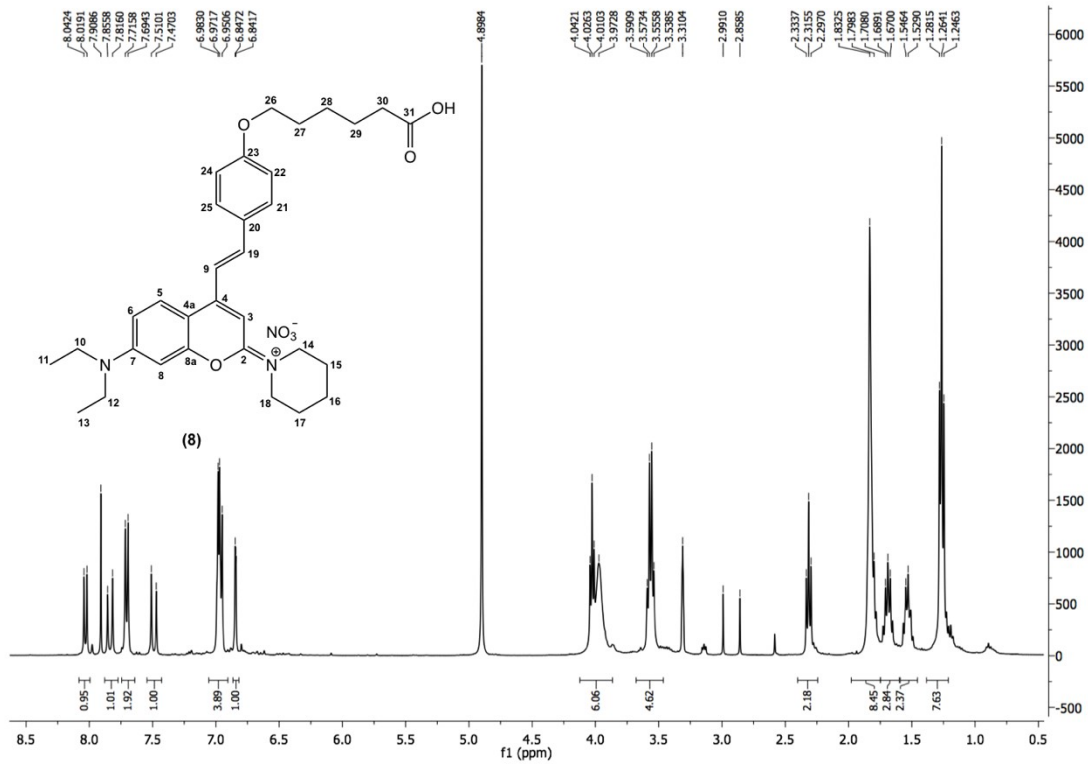

*<sup>1</sup>H-NMR spectrum of 8 (CD<sub>3</sub>OD, 400 MHz)*

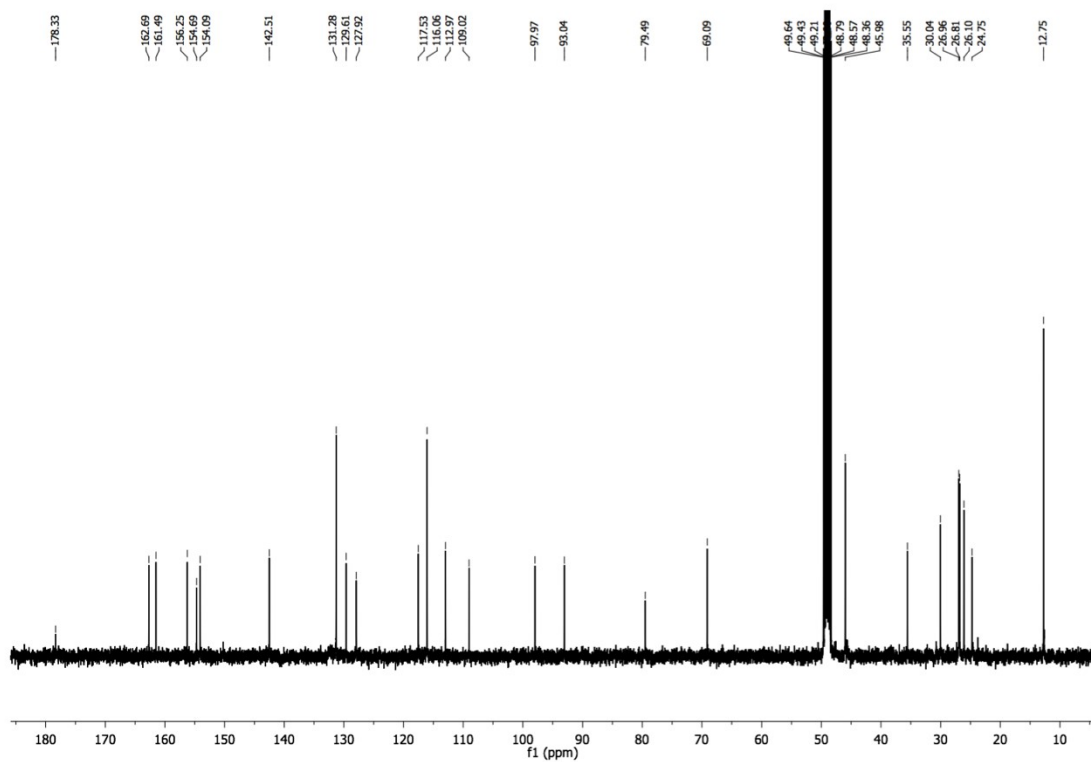

*<sup>13</sup>C-NMR spectrum of 8 (CD<sub>3</sub>OD, 100 MHz)*

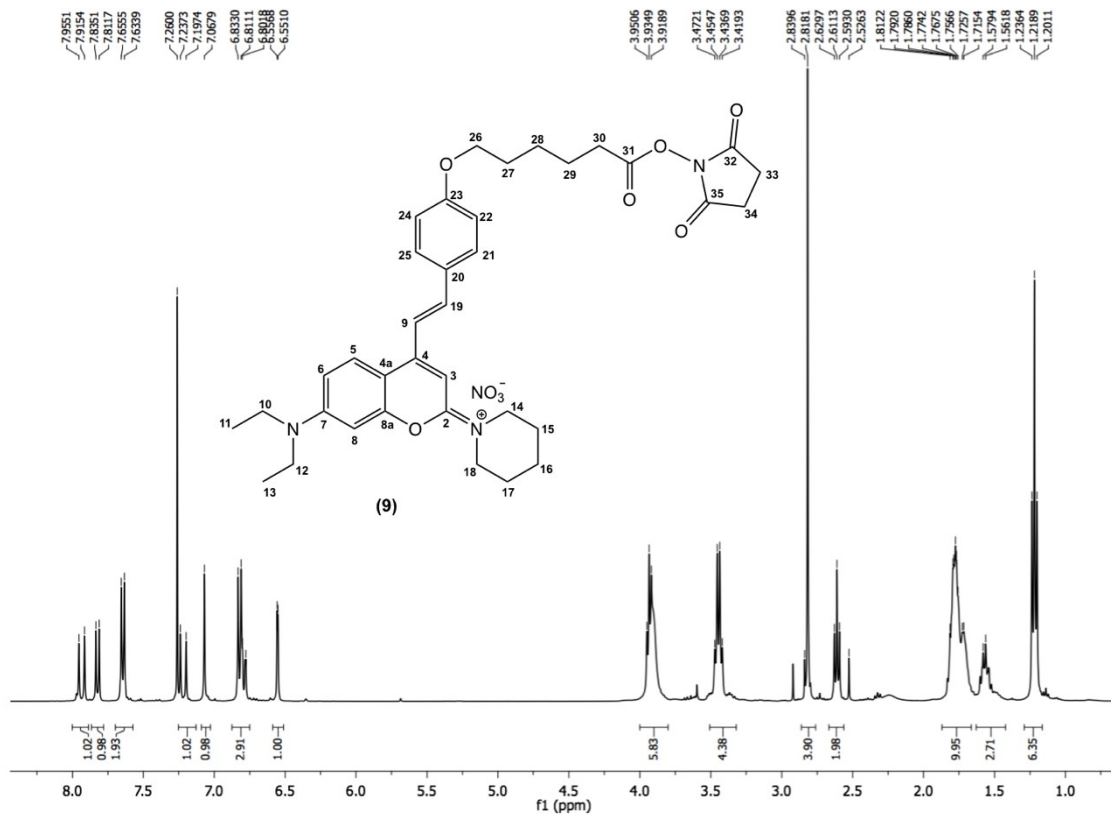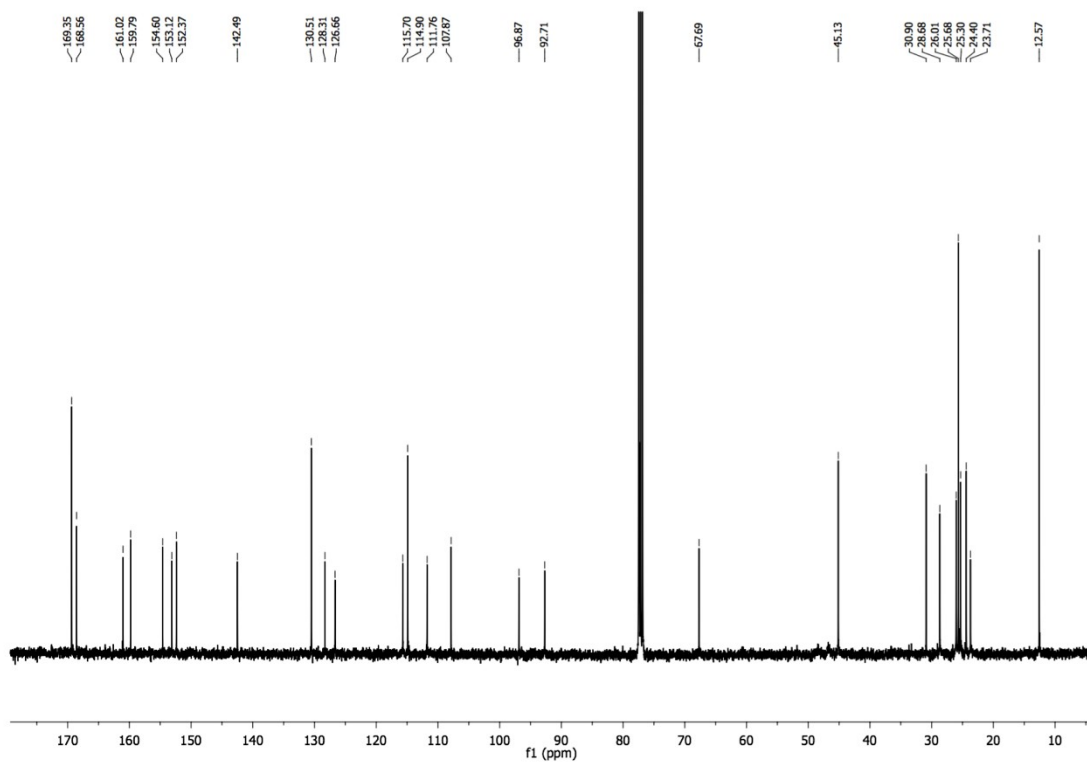

**<sup>13</sup>C-NMR spectrum of 9 (CDCl<sub>3</sub>, 100 MHz)**



## 2 Mass spectra

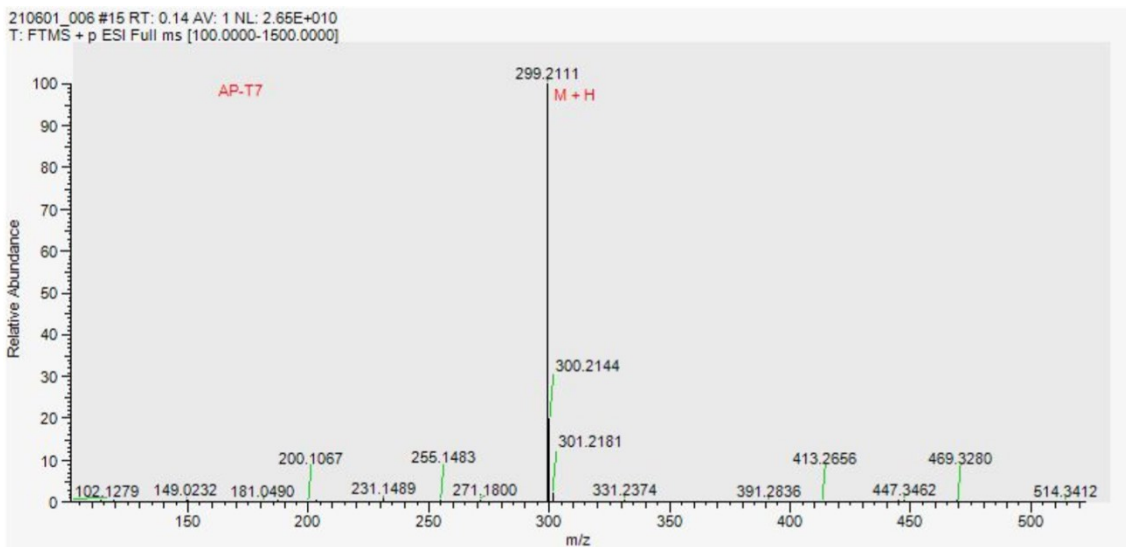

*Mass spectrum of 3*

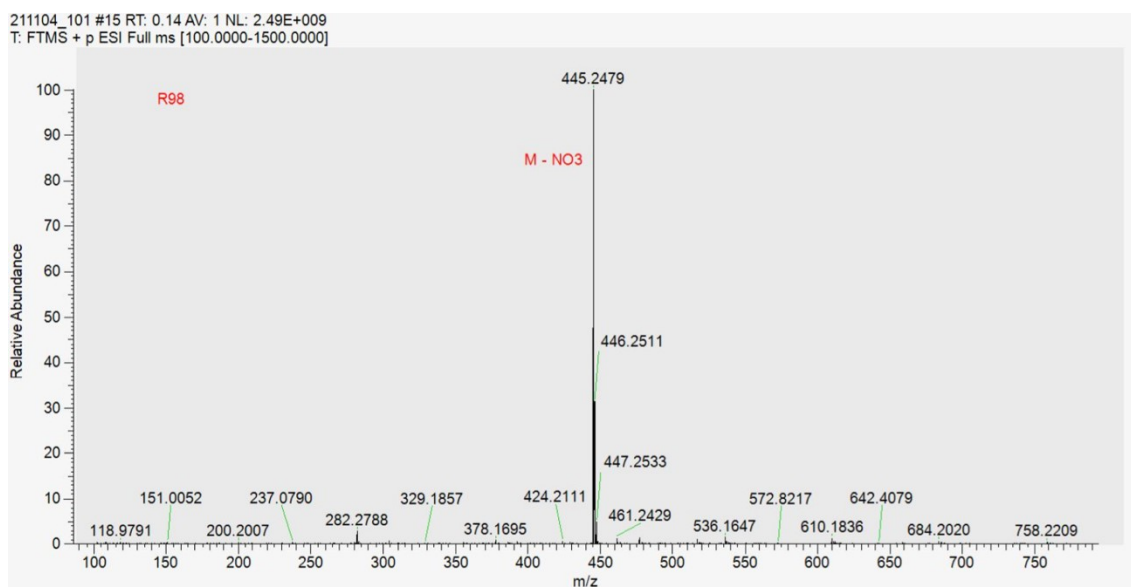

*Mass spectrum of 4*

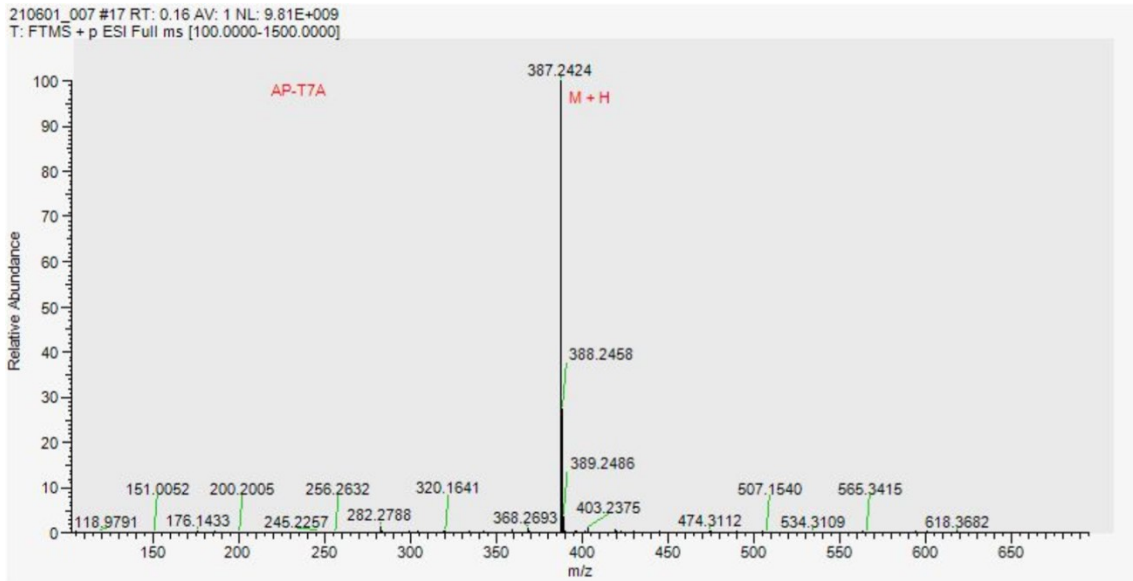

*Mass spectrum of 5*

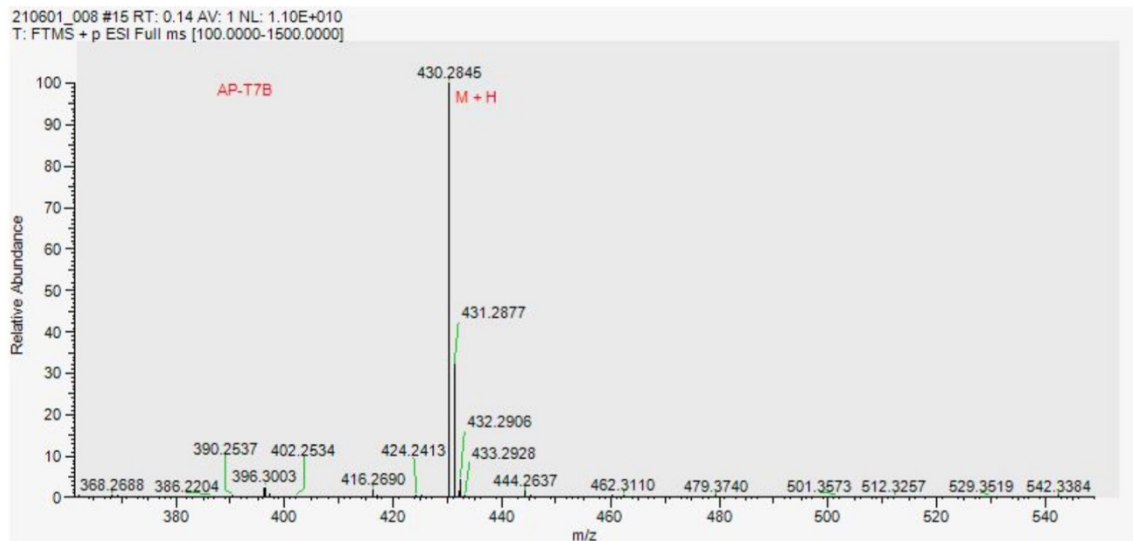

*Mass spectrum of 6*

211104\_098 #17 RT: 0.16 AV: 1 NL: 1.50E+009  
T: FTMS + p ESI Full ms [100.0000-1500.0000]

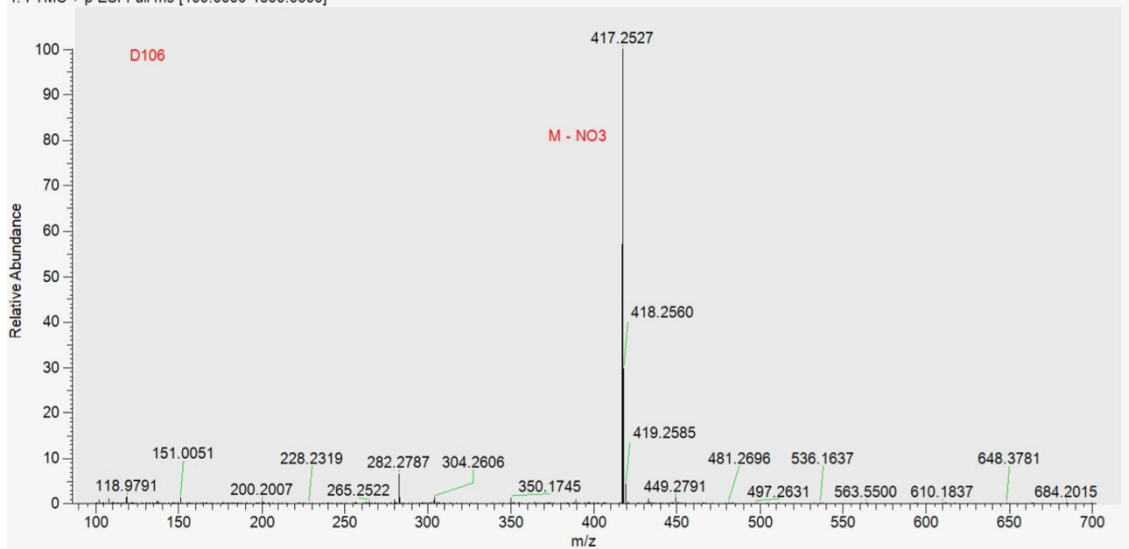

*Mass spectrum of 7*

211104\_100 #15 RT: 0.14 AV: 1 NL: 1.05E+010  
T: FTMS + p ESI Full ms [100.0000-1500.0000]

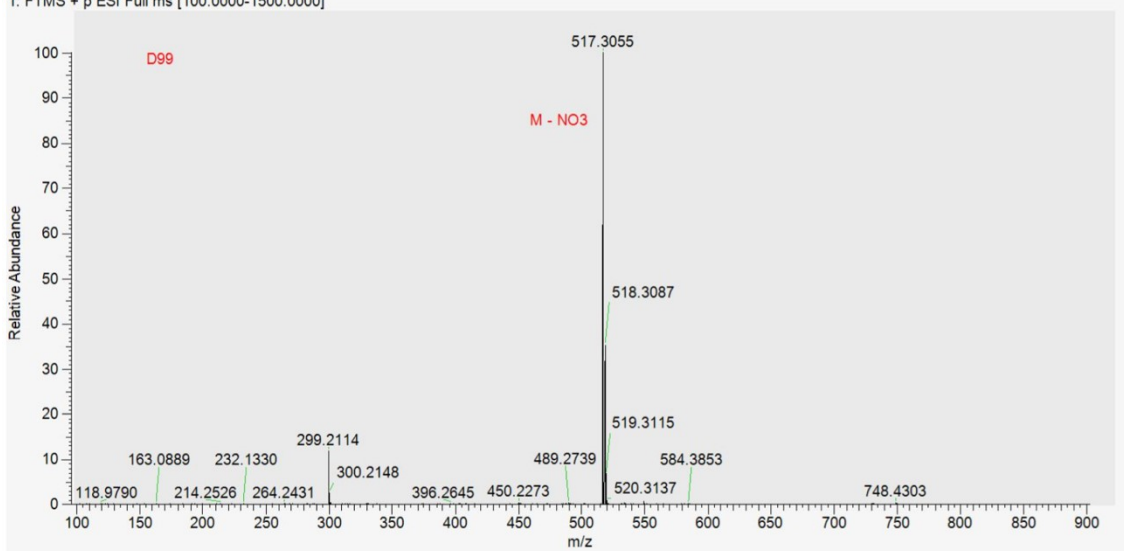

*Mass spectrum of 8*

211104\_099 #15 RT: 0.14 AV: 1 NL: 5.70E+009  
T: FTMS + p ESI Full ms [100.0000-1500.0000]

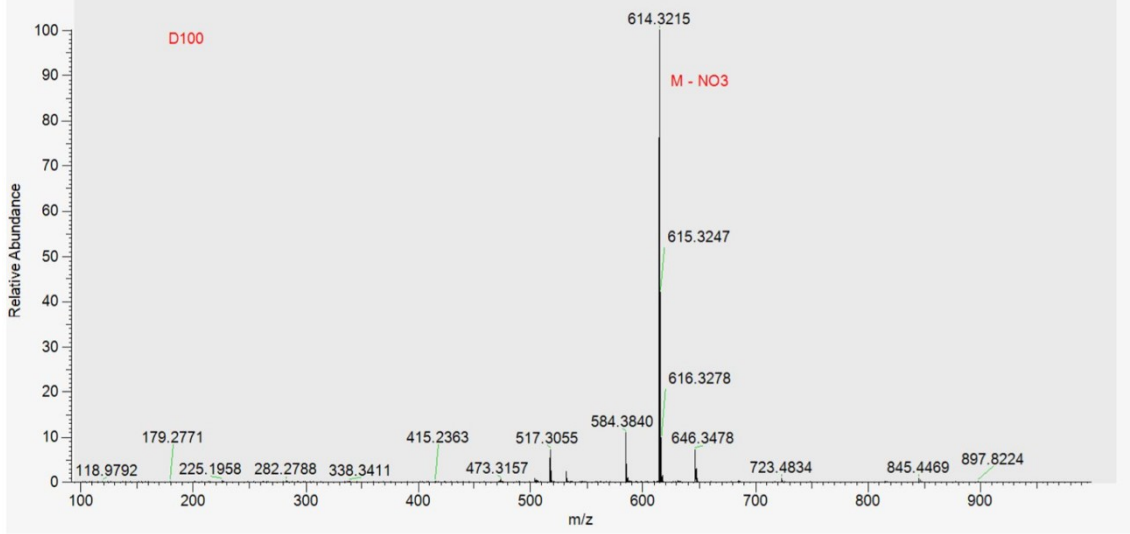

*Mass spectrum of 9*

### 3 UV/Vis spectra

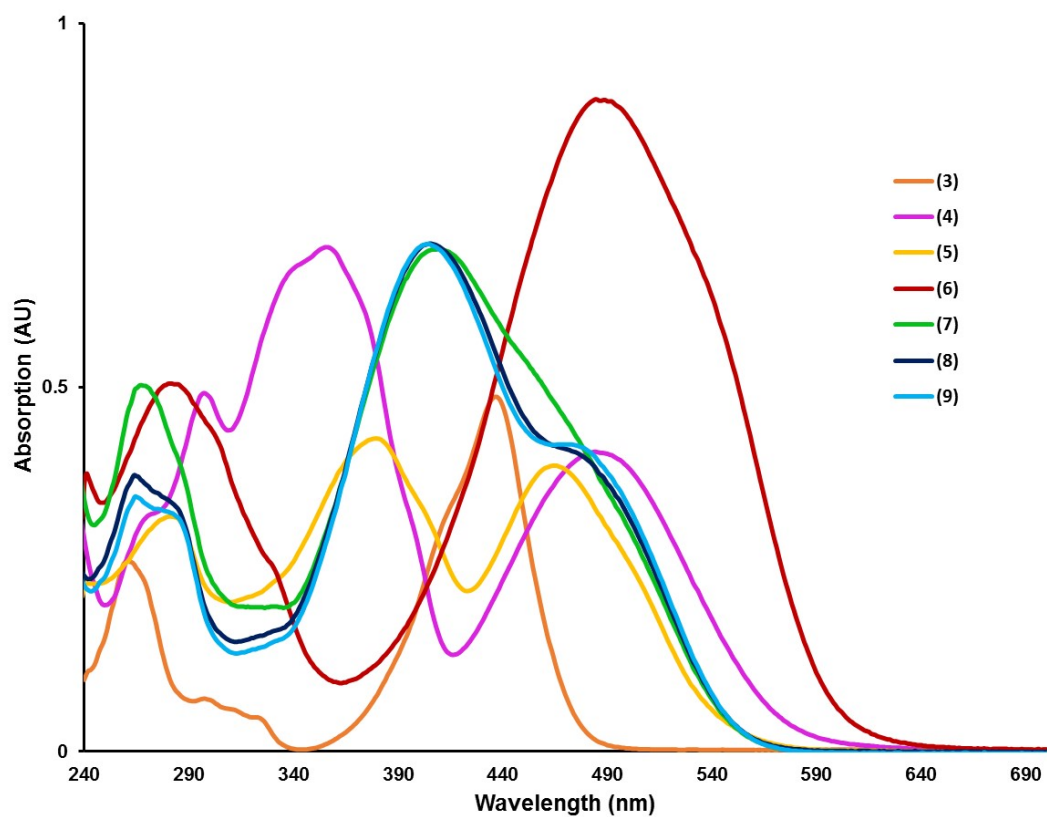

*UV/Vis spectra of 3 to 9*

## 4 Quantum chemical calculations

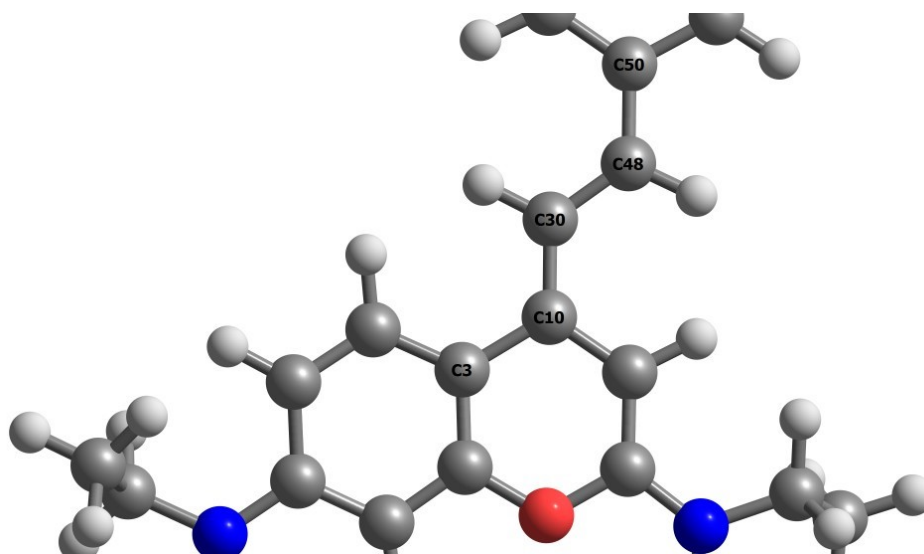

**Figure S1.** Numbering scheme adopted common to all compounds.

**Table S1.** Selected bond distances (Å) and dihedral angle (°) of the compounds in the ground  $S_0$  and excited  $S_1$  states.

| Compound | r[C10-C30] |       | r[C30-C48] |       | r[C48-C50] |       | $D_h$ [C3-C10-C30-C48] |       |
|----------|------------|-------|------------|-------|------------|-------|------------------------|-------|
|          | $S_0$      | $S_1$ | $S_0$      | $S_1$ | $S_0$      | $S_1$ | $S_0$                  | $S_1$ |
| <b>4</b> | 1.456      | 1.408 | 1.349      | 1.384 | 1.459      | 1.431 | 25.5                   | 2.1   |
| <b>5</b> | 1.454      | 1.408 | 1.350      | 1.381 | 1.457      | 1.439 | 23.9                   | 3.1   |
| <b>6</b> | 1.440      | 1.430 | 1.360      | 1.378 | 1.438      | 1.438 | 14.5                   | 6.8   |
| <b>7</b> | 1.449      | 1.407 | 1.353      | 1.383 | 1.450      | 1.436 | 20.9                   | 5.1   |
| <b>9</b> | 1.449      | 1.408 | 1.353      | 1.383 | 1.449      | 1.436 | 19.9                   | 3.6   |

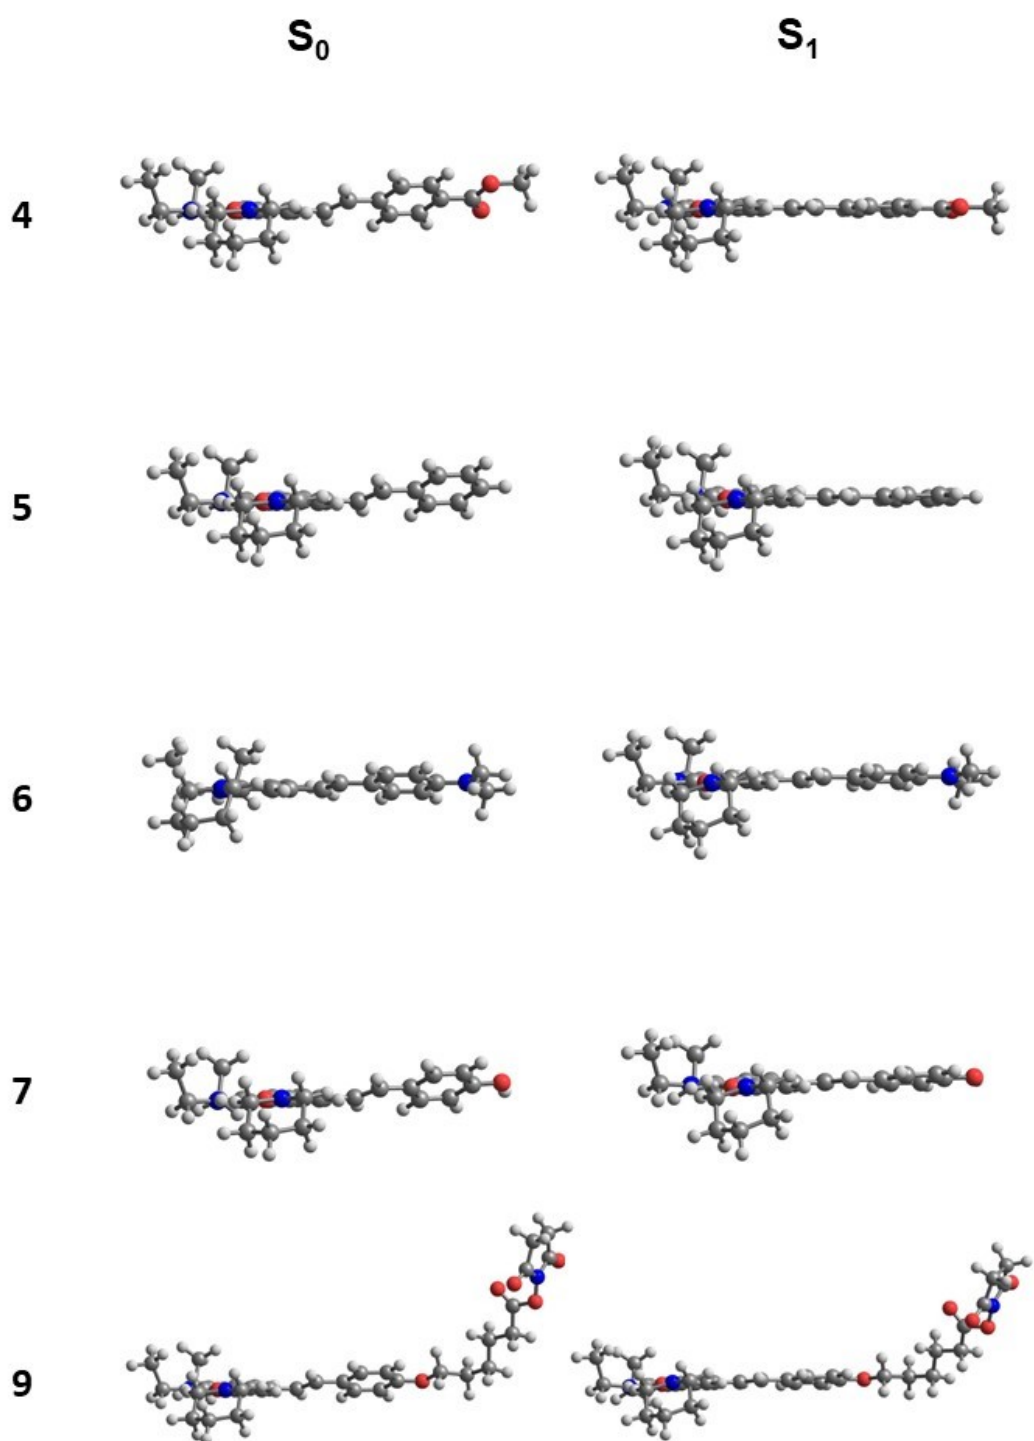

**Figure S2.** Optimized structures of the compounds in the ground  $S_0$  and excited  $S_1$  states.

**Table S2.** Calculated absorption data for the compounds and the main orbitals involved in the transitions.**Compound 4**

| State          | $\lambda$ (nm) | $f$   | Major MO $\rightarrow$ MO transitions |
|----------------|----------------|-------|---------------------------------------|
| S <sub>1</sub> | 494            | 0.534 | HOMO- $\rightarrow$ LUMO (99%)        |
| S <sub>2</sub> | 389            | 1.377 | H-1- $\rightarrow$ LUMO (99%)         |
| S <sub>3</sub> | 333            | 0.087 | H-2- $\rightarrow$ LUMO (94%)         |
| S <sub>4</sub> | 324            | 0.271 | HOMO- $\rightarrow$ L+1 (94%)         |
| S <sub>5</sub> | 304            | 0.041 | H-3- $\rightarrow$ LUMO (93%)         |

**Compound 5**

| State          | $\lambda$ (nm) | $f$   | Major MO $\rightarrow$ MO transitions |
|----------------|----------------|-------|---------------------------------------|
| S <sub>1</sub> | 473            | 0.618 | HOMO- $\rightarrow$ LUMO (99%)        |
| S <sub>2</sub> | 391            | 1.163 | H-1- $\rightarrow$ LUMO (99%)         |
| S <sub>3</sub> | 324            | 0.057 | H-2- $\rightarrow$ LUMO (95%)         |
| S <sub>4</sub> | 304            | 0.026 | H-3- $\rightarrow$ LUMO (95%)         |
| S <sub>5</sub> | 300            | 0.196 | HOMO- $\rightarrow$ L+1 (89%)         |

**Compound 6**

| State          | $\lambda$ (nm) | $f$   | Major MO $\rightarrow$ MO transitions                                                    |
|----------------|----------------|-------|------------------------------------------------------------------------------------------|
| S <sub>1</sub> | 526            | 1.535 | HOMO- $\rightarrow$ LUMO (98%)                                                           |
| S <sub>2</sub> | 457            | 0.518 | H-1- $\rightarrow$ LUMO (98%)                                                            |
| S <sub>3</sub> | 324            | 0.072 | H-3- $\rightarrow$ LUMO (11%), H-2- $\rightarrow$ LUMO (82%)                             |
| S <sub>4</sub> | 309            | 0.113 | H-3- $\rightarrow$ LUMO (29%), HOMO- $\rightarrow$ L+1 (56%)                             |
| S <sub>5</sub> | 305            | 0.036 | H-3- $\rightarrow$ LUMO (48%), H-2- $\rightarrow$ LUMO (15%), H- $\rightarrow$ L+1 (17%) |

**Compound 7**

| State          | $\lambda$ (nm) | $f$   | Major MO $\rightarrow$ MO transitions                        |
|----------------|----------------|-------|--------------------------------------------------------------|
| S <sub>1</sub> | 468            | 0.714 | HOMO- $\rightarrow$ LUMO (98%)                               |
| S <sub>2</sub> | 429            | 1.141 | H-1- $\rightarrow$ LUMO (98%)                                |
| S <sub>3</sub> | 322            | 0.047 | H-2- $\rightarrow$ LUMO (93%)                                |
| S <sub>4</sub> | 296            | 0.150 | HOMO- $\rightarrow$ L+1 (83%), HOMO- $\rightarrow$ L+2 (10%) |
| S <sub>5</sub> | 292            | 0.012 | H-3- $\rightarrow$ LUMO (85%)                                |

**Compound 9**

| State          | $\lambda$ (nm) | $f$   | Major MO $\rightarrow$ MO transitions                        |
|----------------|----------------|-------|--------------------------------------------------------------|
| S <sub>1</sub> | 467            | 0.772 | HOMO- $\rightarrow$ LUMO (97%)                               |
| S <sub>2</sub> | 435            | 1.166 | H-1- $\rightarrow$ LUMO (97%)                                |
| S <sub>3</sub> | 322            | 0.049 | H-2- $\rightarrow$ LUMO (92%)                                |
| S <sub>4</sub> | 296            | 0.093 | H-3- $\rightarrow$ LUMO (16%), HOMO- $\rightarrow$ L+1 (68%) |
| S <sub>5</sub> | 294            | 0.051 | H-3- $\rightarrow$ LUMO (66%), HOMO- $\rightarrow$ L+1 (14%) |



**Table S3.** Calculated emission data for the studied compounds and the main orbitals involved in the  $S_1 \rightarrow S_0$  transitions.

| Compound | $\lambda$ (nm) | $f$   | Major MO $\rightarrow$ MO transitions |
|----------|----------------|-------|---------------------------------------|
| 4        | 578            | 0.450 | HOMO- $\rightarrow$ LUMO (99%)        |
| 5        | 539            | 0.530 | HOMO- $\rightarrow$ LUMO (99%)        |
| 6        | 558            | 1.655 | HOMO- $\rightarrow$ LUMO (99%)        |
| 7        | 525            | 0.647 | HOMO- $\rightarrow$ LUMO (99%)        |
| 9        | 523            | 0.702 | HOMO- $\rightarrow$ LUMO (99%)        |
